# Supplementary material for: Association Between Receipt of Unemployment Insurance and Food Insecurity Among People Who Lost Employment During the COVID-19 Pandemic in the United States
Source: PubMed Central journal article supplement (PMC7846943; doi:10.1001/jamanetworkopen.2020.35884), 2021-01-29
Supplement: jamanetwopen-e2035884-s001.pdf [file jamanetwopen-e2035884-s001.pdf]

## Supplemental Online Content

Raifman J, Bor J, Venkataramani A. Association between receipt of unemployment insurance and food insecurity among people who lost employment during the COVID-19 pandemic in the United States. *JAMA Netw Open*. 2021;4(1):e2035884.  
doi:10.1001/jamanetworkopen.2020.35884

### **eAppendix.** Statistical Model

**eTable 1.** UCA Survey Waves and Dates

**eFigure 1.** Food Insecurity Over Time by Household Income Group

**eTable 2.** Unemployment

**eFigure 2.** Temporal Trends in Food Insecurity and Eating Less Among Those Who Did and Did Not Receive Unemployment Insurance

**eTable 3.** Main Difference-in-Differences Estimates of the Association Between Unemployment Insurance and Outcomes of Food Insecurity and Eating Less Among Participants Who Participated in the UCA Survey at Least Once in Each Month, April to October

**eTable 4.** Main Difference-in-Differences Estimates of the Association Between Unemployment Insurance and Outcomes of Food Insecurity and Eating Less With Survey Weights Included

**eTable 5.** Main Difference-in-Differences Estimates of the Association Between Unemployment Insurance and Outcomes of Food Insecurity and Eating Less Based on Logistic Regression

**eTable 6.** Main Difference-in-Differences Estimates of the Association Between Unemployment Insurance and Outcomes of Food Insecurity and Eating Less Among Those Currently Unemployed

**eTable 7.** Main Difference-in-Differences Estimates of the Association Between Unemployment Insurance and Outcomes of Food Insecurity and Eating Less in Very Low-Income Households (<\$20 000/Year)

This supplemental material has been provided by the authors to give readers additional information about their work.

## **eAppendix. Statistical Model**

Our statistical model is presented in **Equation 1**, where  $FI_{it}$  is a binary indicator for food insecurity,  $UI_{it}$  is a binary indicator that switches from 0 to 1 if the individual begins receiving unemployment insurance,  $S_{it}$  is a binary indicator that switches from 0 to 1 if the individual receives the stimulus payment,  $SNAP_{it}$  is a binary indicator for receiving SNAP benefits in the past month,  $I_i$  is individual fixed effects, and  $t_t$  is period fixed effects. In the event study, we replaced  $UI_{it}$  with dummy variables indicating the number of periods prior to or following receipt of unemployment in insurance.

$$FI_{it} = UI_{it} + S_{it} + SNAP_{it} + CurrentJob_{it} + I_i + t_t + \varepsilon_{ist} \quad (1)$$

**eTable 1. UCA Survey Waves and Dates**

| <b>UCA survey wave</b>                                         | <b>Dates</b>               |
|----------------------------------------------------------------|----------------------------|
| Not included because different sampling strategy and questions | March 10 – March 31        |
| 1                                                              | April 1 – April 28         |
| 2                                                              | April 15 – May 12          |
| 3                                                              | April 29 – May 26          |
| 4                                                              | May 13 – June 9            |
| 5                                                              | May 27 – June 23           |
| 6                                                              | June 10 – July 8           |
| 7                                                              | June 24 – July 22          |
| 8                                                              | July 8 – August 5          |
| 9                                                              | July 22 – August 19        |
| 10                                                             | August 5 – September 2     |
| 11                                                             | August 19 – September 16   |
| 12                                                             | September 2 – September 30 |
| 13                                                             | September 16 – October 14  |
| 14                                                             | September 30 – October 27  |
| 15                                                             | October 14 – November 11   |

Note: New UCA surveys are fielded every two weeks. Each day one fourteenth of participants are invited to take the survey, and participants have two weeks to take the survey – meaning that the total field period for each wave of the survey is 4 weeks and there is overlap between waves. Participants are incentivized to respond to the survey on the day they are invited to participate.

**eFigure 1. Food Insecurity Over Time by Household Income Group**

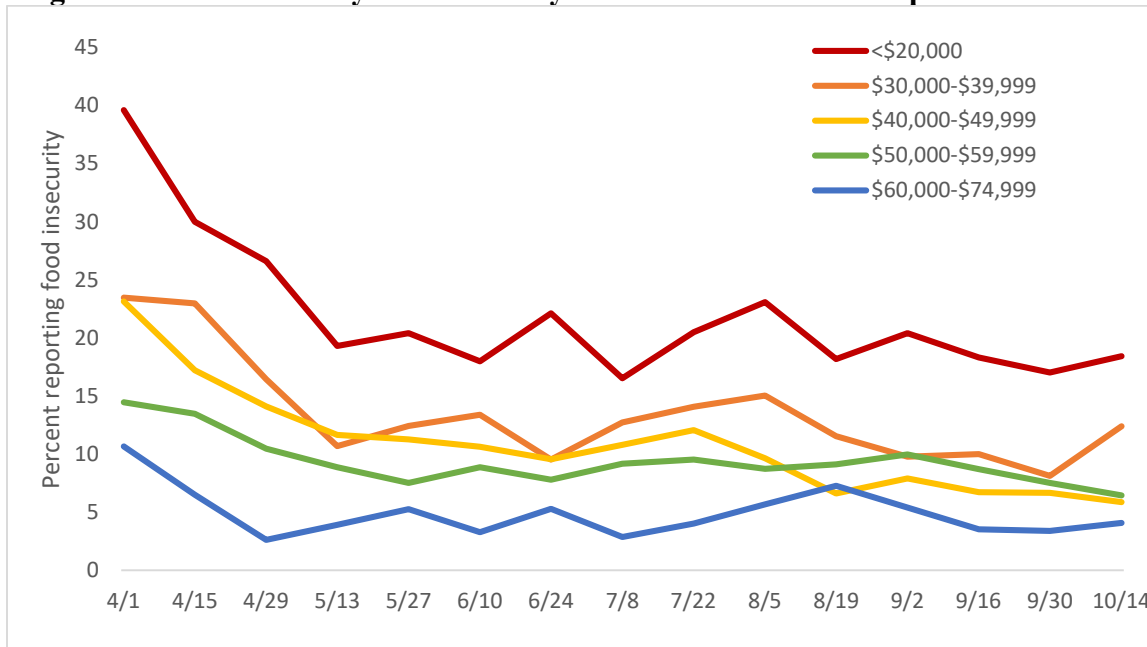

Notes: We conducted the main analysis among people in households earning less than \$75,000 because more than 20% of people in all income groups below \$75,000 reported food insecurity at some point during the COVID-19 pandemic. We conducted a subgroup analysis among people in households earning less than \$20,000 because they were most likely to report food insecurity, with 58% reporting food insecurity at some point during the pandemic.

**eTable 2. Unemployment**

| <b>Characteristic</b>                            | <b>(1)<br/>N with household<br/>income &lt;\$75,000</b> | <b>(2)<br/>N unemployed</b> | <b>(3)<br/>% unemployed at<br/>any point</b> |
|--------------------------------------------------|---------------------------------------------------------|-----------------------------|----------------------------------------------|
| <b>Total</b>                                     | 2,319                                                   | 1,119                       | 48.3                                         |
| <b>Race and ethnicity</b>                        |                                                         |                             |                                              |
| Non-Hispanic White                               | 1,327                                                   | 588                         | 44.3                                         |
| Non-Hispanic Black                               | 243                                                     | 135                         | 55.6                                         |
| Non-Hispanic American Indian<br>or Alaska Native | 30                                                      | 13                          | 43.3                                         |
| Non-Hispanic Asian                               | 125                                                     | 62                          | 49.6                                         |
| Non-Hispanic Hawaiian/Pacific<br>Islander        | 8                                                       | 2                           | 25.0                                         |
| Non- Hispanic Mixed Race                         | 97                                                      | 54                          | 55.7                                         |
| Hispanic                                         | 488                                                     | 265                         | 54.3                                         |
| Not reported                                     | 1                                                       | 0                           | 0.0                                          |
| <b>Sex</b>                                       |                                                         |                             |                                              |
| Female                                           | 1466                                                    | 732                         | 49.9                                         |
| Male                                             | 853                                                     | 387                         | 45.4                                         |
| <b>Income group</b>                              |                                                         |                             |                                              |
| <\$20,000                                        | 368                                                     | 282                         | 76.6                                         |
| \$20,000 to \$29,999                             | 306                                                     | 176                         | 57.5                                         |
| \$30,000 to \$39,999                             | 388                                                     | 186                         | 47.9                                         |
| \$40,000 to \$59,999                             | 743                                                     | 293                         | 39.4                                         |
| \$60,000 to \$74,999                             | 514                                                     | 182                         | 35.4                                         |
| <b>Age group</b>                                 |                                                         |                             |                                              |
| 18 to 29 years                                   | 399                                                     | 223                         | 55.9                                         |
| 30 to 39 years                                   | 577                                                     | 251                         | 43.5                                         |
| 40 to 49 years                                   | 459                                                     | 187                         | 40.7                                         |
| 50 to 59 years                                   | 470                                                     | 229                         | 48.7                                         |
| ≥60 years                                        | 414                                                     | 229                         | 55.3                                         |
| <b>Sexual orientation</b>                        |                                                         |                             |                                              |
| LGB                                              | 222                                                     | 126                         | 56.8                                         |
| Heterosexual                                     | 2097                                                    | 993                         | 47.4                                         |
| <b>Gender identity</b>                           |                                                         |                             |                                              |
| Cisgender                                        | 2,293                                                   | 1,100                       | 48.0                                         |
| Transgender or non-binary                        | 26                                                      | 19                          | 73.1                                         |
| <b>Adult households</b>                          |                                                         |                             |                                              |
| Single adult, no children                        | 532                                                     | 268                         | 50.4                                         |
| Two adults, no children                          | 1027                                                    | 497                         | 48.4                                         |
| <b>Households with children</b>                  |                                                         |                             |                                              |
| 1 adult, with children                           | 96                                                      | 47                          | 49.0                                         |
| ≥2 adults, with children                         | 664                                                     | 307                         | 46.2                                         |

Note: We present the number and percentage of people with each characteristic who lost employment. Characteristics are based on the first observation for each participant in the sample. All observations are from individuals who participated in at least 2 waves of the UCA survey. Numbers and percentages represent the full sample and are unweighted.

**eFigure 2. Temporal Trends in Food Insecurity and Eating Less Among Those Who Did and Did Not Receive Unemployment Insurance**

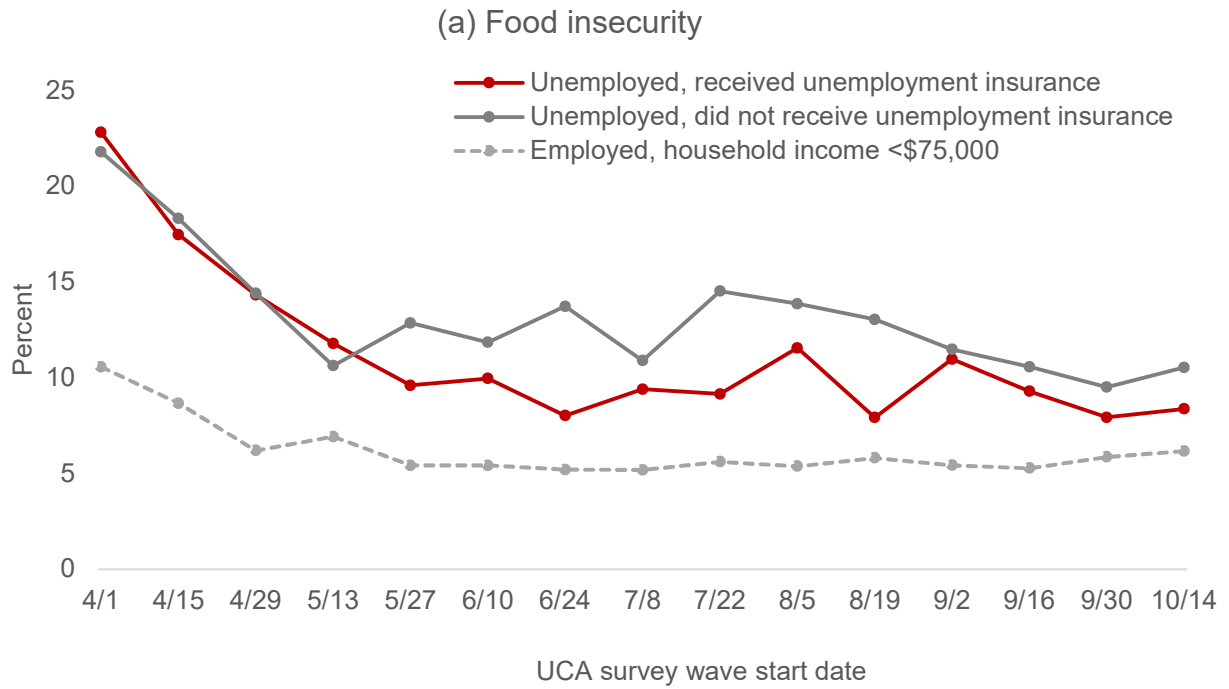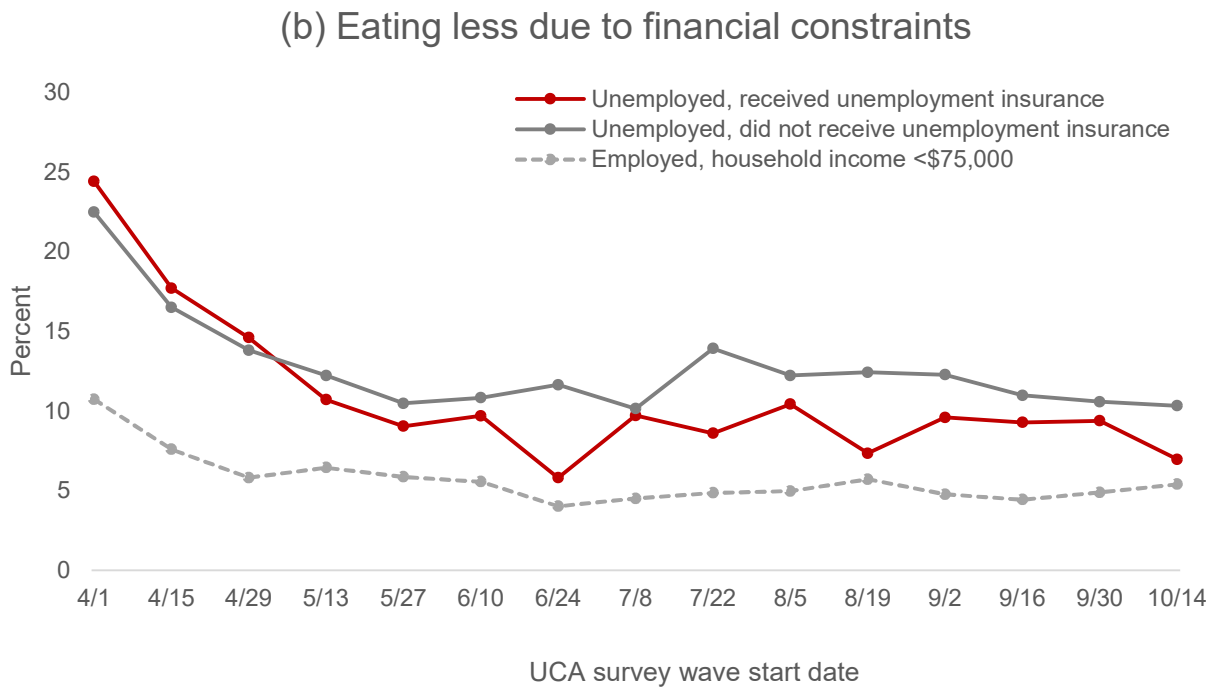

**eTable 3.** Main Difference-in-Differences Estimates of the Association Between Unemployment Insurance and Outcomes of Food Insecurity and Eating Less Among Participants Who Participated in the UCA Survey at Least Once in Each Month, April to October

|                                                                   | (1) Unemployment insurance              |               | (2) Unemployment insurance and CARES    |               | (3) Unemployment insurance amount       |                |
|-------------------------------------------------------------------|-----------------------------------------|---------------|-----------------------------------------|---------------|-----------------------------------------|----------------|
|                                                                   | Percentage points                       | 95% CI        | Percentage points                       | 95% CI        | Percentage points                       | 95% CI         |
|                                                                   | Participants: 678<br>Observations: 9492 |               | Participants: 678<br>Observations: 9492 |               | Participants: 678<br>Observations: 9041 |                |
| <b>(a) Food insecurity</b>                                        |                                         |               |                                         |               |                                         |                |
| <b>Unemployment insurance</b>                                     | -4.07                                   | -7.13 - -1.00 |                                         |               |                                         |                |
| <b>Unemployment insurance with CARES \$600/week supplement</b>    |                                         |               | -5.13                                   | -8.06 - -2.21 |                                         |                |
| <b>Unemployment insurance without CARES \$600/week supplement</b> |                                         |               | -3.05                                   | -6.64 - 0.54  |                                         |                |
| <b>Unemployment insurance amount</b>                              |                                         |               |                                         |               |                                         |                |
| No unemployment insurance                                         |                                         |               |                                         |               | Reference                               |                |
| \$1 to 300                                                        |                                         |               |                                         |               | -3.45                                   | -8.28 - -1.38  |
| \$301 to 600                                                      |                                         |               |                                         |               | -3.46                                   | -7.59 - -0.66  |
| \$601 to 900                                                      |                                         |               |                                         |               | -3.64                                   | -7.39 - -0.11  |
| \$901 to 1200                                                     |                                         |               |                                         |               | -5.57                                   | -10.13 - -1.01 |
| \$1201 to 1500                                                    |                                         |               |                                         |               | -4.49                                   | -8.63 - -0.35  |
| ≥\$1500                                                           |                                         |               |                                         |               | -6.30                                   | -9.15 - -3.46  |
| <b>Stimulus payment</b>                                           | -0.97                                   | -4.12 - -2.18 | -0.97                                   | -4.13 - -2.18 | -0.50                                   | -3.56 - 2.56   |



|                           |           |                   |  |           |                   |                                            |
|---------------------------|-----------|-------------------|--|-----------|-------------------|--------------------------------------------|
|                           |           |                   |  |           |                   | 2 -<br>2.5<br>1                            |
| <b>SNAP</b>               | -1.14     | -4.72 -<br>2.43   |  | -1.17     | -4.74 - 2.40      | -0.91<br>-<br>4.6<br>8 -<br>2.8<br>5       |
| <b>Currently employed</b> | -4.34     | -6.22 -<br>-2.46  |  | -4.27     | -6.12 - -2.42     | -4.30<br>-<br>6.1<br>8 -<br>-<br>2.4<br>1  |
| <b>Study wave</b>         |           |                   |  |           |                   |                                            |
| April 1 – April 28        | Reference |                   |  | Reference |                   | Refere<br>nce                              |
| April 15 – May 12         | -6.27     | -10.03 -<br>-2.51 |  | -5.04     | -8.57 - -1.52     | -6.48<br>-<br>10.<br>26<br>--<br>2.6<br>9  |
| April 29 – May 26         | -8.48     | -12.66 -<br>-4.29 |  | -7.01     | -10.83 --<br>3.18 | -8.69<br>-<br>12.<br>89<br>--<br>4.4<br>9  |
| May 13 – June 9           | -10.43    | -14.97 -<br>-5.88 |  | -8.69     | -12.80 --<br>4.58 | -10.70<br>-<br>15.<br>23<br>--<br>6.1<br>7 |
| May 27 – June 23          | -10.58    | -15.25 -<br>-5.92 |  | -7.89     | -12.04 --<br>3.74 | -11.26<br>-<br>15.<br>89<br>--<br>6.6<br>2 |
| June 10 – July 8          | -11.20    | -15.78 -<br>-6.61 |  | -9.15     | -13.34 --<br>4.97 | -11.68<br>-<br>16.<br>25<br>--<br>7.1<br>0 |
| June 24 – July 22         | -12.46    | -17.09 -<br>-7.83 |  | -8.70     | -12.95 --<br>4.46 | -12.68<br>-<br>17.<br>30<br>--<br>8.0<br>6 |
| July 8 – Aug 5            | -11.15    | -15.88 -<br>-6.42 |  | -8.24     | -12.50 --<br>3.98 | -11.77<br>-<br>16.<br>49<br>--<br>7.0<br>4 |
| July 22 – Aug 19          | -10.70    | -15.48 -<br>-5.92 |  | -7.67     | -12.00 --<br>3.33 | -11.09<br>-<br>15.                         |

|                                                                   |        |                  |        |                   |        |                             |                             |
|-------------------------------------------------------------------|--------|------------------|--------|-------------------|--------|-----------------------------|-----------------------------|
|                                                                   |        |                  |        |                   |        |                             | 85<br>--<br>6.3<br>2        |
| Aug 5 – Sept 2                                                    | -10.41 | -15.23<br>--5.60 | -7.83  | -12.09 --<br>3.56 | -11.11 | -                           | 15.<br>97<br>--<br>6.2<br>4 |
| Aug 19 – Sept 16                                                  | -11.46 | -16.26<br>--6.66 | -9.46  | -13.87 --<br>5.04 | -11.97 | -                           | 16.<br>78<br>--<br>7.1<br>6 |
| Sept 2 – Sept 30                                                  | -10.67 | -15.52<br>--5.83 | -9.26  | -13.68 --<br>4.84 | -11.82 | -                           | 16.<br>73<br>--<br>6.9<br>0 |
| Sept 16 – Oct 14                                                  | -11.01 | -15.83<br>--6.18 | -10.53 | -14.82 --<br>6.23 | -11.82 | -                           | 16.<br>70<br>--<br>6.9<br>5 |
| Sept 30 – Oct 27                                                  | -11.04 | -15.84<br>--6.25 | -10.75 | -15.06 --<br>6.43 | -11.84 | -                           | 16.<br>68<br>--<br>6.9<br>9 |
| Oct 14 – Nov 11                                                   | -12.06 | -16.73<br>--7.39 | -10.22 | -14.56 --<br>5.88 | -12.67 | -                           | 17.<br>40<br>--<br>7.9<br>4 |
| <b>Constant</b>                                                   | 20.90  | 18.00 -<br>23.80 | 20.83  | 17.93 -<br>23.73  | 20.49  | 17.<br>62<br>-<br>23.<br>36 |                             |
| <b>(b) Eating less due to financial constraints</b>               |        |                  |        |                   |        |                             |                             |
| <b>Unemployment insurance</b>                                     | -5.54  | -8.82 -<br>-2.27 |        |                   |        |                             |                             |
| <b>Unemployment insurance with CARES \$600/week supplement</b>    |        |                  | -6.83  | -10.06 --<br>3.60 |        |                             |                             |
| <b>Unemployment insurance without CARES \$600/week supplement</b> |        |                  | -4.19  | -7.86 - -0.51     |        |                             |                             |
| <b>Unemployment insurance amount</b>                              |        |                  |        |                   |        |                             |                             |
| No unemployment insurance                                         |        |                  |        |                   |        | Reference                   |                             |
| \$1 to 300                                                        |        |                  |        |                   |        | -3.68                       | -<br>8.9<br>5 -             |

|                           |           |                  |  |           |                   |               |                                  |
|---------------------------|-----------|------------------|--|-----------|-------------------|---------------|----------------------------------|
|                           |           |                  |  |           |                   |               | 1.6<br>0                         |
| \$301 to 600              |           |                  |  |           |                   | -6.18         | -<br>10.<br>95<br>--<br>1.4<br>1 |
| \$601 to 900              |           |                  |  |           |                   | -5.12         | -<br>9.8<br>7-<br>-<br>0.3<br>8  |
| \$901 to 1200             |           |                  |  |           |                   | -5.85         | -<br>10.<br>19<br>--<br>1.5<br>1 |
| \$1201 to 1500            |           |                  |  |           |                   | -6.14         | -<br>10.<br>42<br>--<br>1.8<br>7 |
| ≥\$1500                   |           |                  |  |           |                   | -8.67         | -<br>13.<br>13<br>--<br>4.2<br>1 |
| <b>Stimulus payment</b>   | -0.91     | -4.46 -<br>2.65  |  | -0.91     | -4.47 - 2.65      | -0.20         | -<br>3.7<br>2-<br>3.3<br>2       |
| <b>SNAP</b>               | -1.84     | -6.34 -<br>2.66  |  | -1.87     | -6.36 - 2.62      | -1.40         | -<br>6.0<br>2-<br>3.2<br>1       |
| <b>Currently employed</b> | -5.04     | -6.97 -<br>-3.12 |  | -4.93     | -6.82 - -3.05     | -5.09         | -<br>7.0<br>2-<br>-<br>3.1<br>6  |
| <b>Study wave</b>         |           |                  |  |           |                   |               |                                  |
| April 1 – April 28        | Reference |                  |  | Reference |                   | Refere<br>nce |                                  |
| April 15 – May 12         | -6.27     | -10.03<br>--2.51 |  | -6.18     | -9.93 - -2.42     | -6.48         | -<br>10.<br>26<br>--<br>2.6<br>9 |
| April 29 – May 26         | -8.48     | -12.66<br>--4.29 |  | -8.30     | -12.48 --<br>4.13 | -8.69         | -<br>12.<br>89<br>--             |

|                   |        |                  |        |                   |        |                                  |
|-------------------|--------|------------------|--------|-------------------|--------|----------------------------------|
|                   |        |                  |        |                   |        | 4.4<br>9                         |
| May 13 – June 9   | -10.43 | -14.97<br>--5.88 | -10.21 | -14.74 --<br>5.68 | -10.70 | -<br>15.<br>23<br>--<br>6.1<br>7 |
| May 27 – June 23  | -10.58 | -15.25<br>--5.92 | -10.37 | -15.04 --<br>5.70 | -11.26 | -<br>15.<br>89<br>--<br>6.6<br>2 |
| June 10 – July 8  | -11.20 | -15.78<br>--6.61 | -10.97 | -15.55 --<br>6.38 | -11.68 | -<br>16.<br>25<br>--<br>7.1<br>0 |
| June 24 – July 22 | -12.46 | -17.09<br>--7.83 | -12.19 | -16.83 --<br>7.56 | -12.68 | -<br>17.<br>30<br>--<br>8.0<br>6 |
| July 8 – Aug 5    | -11.15 | -15.88<br>--6.42 | -10.88 | -15.60 --<br>6.15 | -11.77 | -<br>16.<br>49<br>--<br>7.0<br>4 |
| July 22 – Aug 19  | -10.70 | -15.48<br>--5.92 | -10.45 | -15.21 --<br>5.68 | -11.09 | -<br>15.<br>85<br>--<br>6.3<br>2 |
| Aug 5 – Sept 2    | -10.41 | -15.23<br>--5.60 | -10.41 | -15.24 --<br>5.58 | -11.11 | -<br>15.<br>97<br>--<br>6.2<br>4 |
| Aug 19 – Sept 16  | -11.46 | -16.26<br>--6.66 | -11.75 | -16.57 --<br>6.92 | -11.97 | -<br>16.<br>78<br>--<br>7.1<br>6 |
| Sept 2 – Sept 30  | -10.67 | -15.52<br>--5.83 | -10.95 | -15.83 --<br>6.08 | -11.82 | -<br>16.<br>73<br>--<br>6.9<br>0 |
| Sept 16 – Oct 14  | -11.01 | -15.83<br>--6.18 | -11.29 | -16.15 --<br>6.43 | -11.82 | -<br>16.<br>70<br>--<br>6.9<br>5 |

|                  |        |                  |        |                   |        |                                  |
|------------------|--------|------------------|--------|-------------------|--------|----------------------------------|
| Sept 30 – Oct 27 | -11.04 | -15.84<br>--6.25 | -11.30 | -16.14 --<br>6.47 | -11.84 | -<br>16.<br>68<br>--<br>6.9<br>9 |
| Oct 14 – Nov 11  | -12.06 | -16.73<br>--7.39 | -12.34 | -17.05 --<br>7.63 | -12.67 | -<br>17.<br>40<br>--<br>7.9<br>4 |
| <b>Constant</b>  | 23.14  | 20.09 -<br>26.19 | 23.04  | 20.00 -<br>26.08  | 22.88  | 19.<br>85<br>-<br>25.<br>90      |

**eTable 4.** Difference-in-Differences Estimates of the Association Between Unemployment Insurance and Outcomes of Food Insecurity and Eating Less With Survey Weights Included

|                                                                   | (1) Unemployment insurance                 |               | (2) Unemployment insurance and CARES       |               | (3) Unemployment insurance amount          |                |
|-------------------------------------------------------------------|--------------------------------------------|---------------|--------------------------------------------|---------------|--------------------------------------------|----------------|
|                                                                   | Percentage points                          | 95% CI        | Percentage points                          | 95% CI        | Percentage points                          | 95% CI         |
|                                                                   | Participants: 1119<br>Observations: 12,596 |               | Participants: 1119<br>Observations: 12,596 |               | Participants: 1118<br>Observations: 12,004 |                |
| <b>(a) Food insecurity</b>                                        |                                            |               |                                            |               |                                            |                |
| <b>Unemployment insurance</b>                                     | -3.50                                      | -6.40 - -0.59 |                                            |               |                                            |                |
| <b>Unemployment insurance with CARES \$600/week supplement</b>    |                                            |               | -5.63                                      | -8.54 - -2.73 |                                            |                |
| <b>Unemployment insurance without CARES \$600/week supplement</b> |                                            |               | -1.89                                      | -5.19 - 1.42  |                                            |                |
| <b>Unemployment insurance amount</b>                              |                                            |               |                                            |               |                                            |                |
| No unemployment insurance                                         |                                            |               |                                            |               | Reference                                  |                |
| \$1 to 300                                                        |                                            |               |                                            |               | -3.19                                      | -7.40 - -1.02  |
| \$301 to 600                                                      |                                            |               |                                            |               | 0.31                                       | -4.23 - 4.86   |
| \$601 to 900                                                      |                                            |               |                                            |               | -2.50                                      | -5.89 - -0.88  |
| \$901 to 1200                                                     |                                            |               |                                            |               | -8.63                                      | -13.82 - -3.44 |
| \$1201 to 1500                                                    |                                            |               |                                            |               | -5.78                                      | -9.11 - -2.45  |
| ≥\$1500                                                           |                                            |               |                                            |               | -5.08                                      | -8.65 - -1.51  |
| <b>Stimulus payment</b>                                           | -3.19                                      | -6.62 - 0.23  | -3.15                                      | -6.57 - 0.28  | -3.01                                      | -6.38 -        |

|                           |           |                |  |                       |           |                  |
|---------------------------|-----------|----------------|--|-----------------------|-----------|------------------|
|                           |           |                |  |                       |           | 0.36             |
| <b>SNAP</b>               | 0.84      | -3.33 - 5.00   |  | -3.32 - 4.99          | 1.35      | - 3.02 - 5.72    |
| <b>Currently employed</b> | -5.95     | -8.02 - -3.88  |  | -5.88 -7.93 - -3.83   | -5.87     | - 7.91 - - 3.82  |
| <b>Study wave</b>         |           |                |  |                       |           |                  |
| April 1 – April 28        | Reference |                |  | Reference             | Reference |                  |
| April 15 – May 12         | -4.06     | -8.37 - 0.26   |  | -3.95 -8.27 - 0.38    | -4.28     | - 8.51 - - 0.06  |
| April 29 – May 26         | -6.65     | -11.18 - -2.12 |  | -6.48 -11.02 - - 1.94 | -6.80     | - 11.24 - - 2.35 |
| May 13 – June 9           | -6.07     | -10.97 - -1.17 |  | -5.82 -10.75 - - 0.90 | -6.41     | - 11.25 - - 1.56 |
| May 27 – June 23          | -6.16     | -10.97 - -1.34 |  | -5.94 -10.77 - - 1.11 | -6.22     | - 11.03 - - 1.41 |
|                           | -7.45     | -12.23 - -2.68 |  | -7.23 -12.03 - - 2.44 | -7.79     | - 12.55 - - 3.04 |
| June 24 – July 22         | -6.42     | -11.27 - -1.56 |  | -6.18 -11.05 - - 1.30 | -5.84     | - 10.66 - - 1.01 |
| July 8 – Aug 5            | -6.76     | -11.56 - -1.96 |  | -6.47 -11.29 - - 1.65 | -6.49     | - 11.27 - - 1.71 |
| July 22 – Aug 19          | -5.77     | -10.64 - -0.90 |  | -5.56 -10.45 - - 0.68 | -5.57     | - 10.38          |

|                                                                   |        |                   |  |        |                   |               |                                            |
|-------------------------------------------------------------------|--------|-------------------|--|--------|-------------------|---------------|--------------------------------------------|
|                                                                   |        |                   |  |        |                   |               | --<br>0.7<br>5                             |
| Aug 5 – Sept 2                                                    | -6.76  | -11.62<br>- -1.91 |  | -6.86  | -11.72 --<br>1.99 |               | -7.28<br>-<br>12.<br>07<br>--<br>2.4<br>9  |
| Aug 19 – Sept 16                                                  | -7.49  | -12.36<br>- -2.61 |  | -7.90  | -12.80 --<br>3.01 |               | -8.01<br>-<br>12.<br>85<br>--<br>3.1<br>7  |
| Sept 2 – Sept 30                                                  | -8.05  | -12.88<br>- -3.22 |  | -8.44  | -13.28 --<br>3.61 |               | -8.35<br>-<br>13.<br>12<br>--<br>3.5<br>8  |
| Sept 16 – Oct 14                                                  | -9.64  | -14.54<br>- -4.74 |  | -10.03 | -14.94 --<br>5.11 |               | -10.23<br>-<br>15.<br>11<br>--<br>5.3<br>5 |
| Sept 30 – Oct 27                                                  | -11.66 | -16.59<br>- -6.74 |  | -12.02 | -16.96 --<br>7.09 |               | -11.27<br>-<br>16.<br>17<br>--<br>6.3<br>7 |
| Oct 14 – Nov 11                                                   | -8.89  | -13.86<br>- -3.92 |  | -9.26  | -14.25 --<br>4.28 |               | -8.66<br>-<br>13.<br>62<br>--<br>3.6<br>9  |
| <b>Constant</b>                                                   | 14.72  | 11.04 -<br>18.39  |  | 14.64  | 10.96 - 18.32     |               | 14.58<br>10.<br>89<br>-<br>18.<br>26       |
| <b>(b) Eating less due to financial constraints</b>               |        |                   |  |        |                   |               |                                            |
| <b>Unemployment insurance</b>                                     | -5.82  | -8.85 -<br>-2.79  |  |        |                   |               |                                            |
| <b>Unemployment insurance with CARES \$600/week supplement</b>    |        |                   |  | -6.84  | -9.96 - -3.71     |               |                                            |
| <b>Unemployment insurance without CARES \$600/week supplement</b> |        |                   |  | -4.71  | -8.00 - -1.41     |               |                                            |
| <b>Unemployment insurance amount</b>                              |        |                   |  |        |                   |               |                                            |
| No unemployment insurance                                         |        |                   |  |        |                   | Refere<br>nce |                                            |
| \$1 to 300                                                        |        |                   |  |        |                   | -4.95         | -<br>9.5<br>5 -<br>-<br>0.3<br>6           |



|                           |           |                   |  |           |                    |               |                              |
|---------------------------|-----------|-------------------|--|-----------|--------------------|---------------|------------------------------|
| \$301 to 600              |           |                   |  |           |                    | -4.46         | -9.5<br>5-<br>0.6<br>2       |
| \$601 to 900              |           |                   |  |           |                    | -5.90         | -9.7<br>9-<br>-<br>2.0<br>2  |
| \$901 to 1200             |           |                   |  |           |                    | -2.89         | -6.9<br>3-<br>1.1<br>4       |
| \$1201 to 1500            |           |                   |  |           |                    | -6.26         | -9.6<br>8-<br>-<br>2.8<br>5  |
| ≥\$1500                   |           |                   |  |           |                    | -7.64         | -11.<br>71<br>--<br>3.5<br>8 |
| <b>Stimulus payment</b>   | -0.92     | -4.73 -<br>2.88   |  | -0.91     | -4.72 - 2.90       | -0.73         | -4.5<br>4-<br>3.0<br>8       |
| <b>SNAP</b>               | -0.41     | -4.73 -<br>3.91   |  | -0.43     | -4.75 - 3.88       | -0.24         | -4.8<br>2-<br>4.3<br>4       |
| <b>Currently employed</b> | -7.10     | -9.24 -<br>-4.95  |  | -6.96     | -9.08 - -4.84      | -6.94         | -9.0<br>9-<br>-<br>4.7<br>8  |
| <b>Study wave</b>         |           |                   |  |           |                    |               |                              |
| April 1 – April 28        | Reference |                   |  | Reference |                    | Refere<br>nce |                              |
| April 15 – May 12         | -5.67     | -10.24 -<br>-1.10 |  | -5.61     | -10.19 - -<br>1.04 | -5.81         | -10.<br>31<br>--<br>1.3<br>0 |
| April 29 – May 26         | -7.41     | -12.37 -<br>-2.45 |  | -7.33     | -12.30 - -<br>2.36 | -7.59         | -12.<br>52<br>--<br>2.6<br>5 |
| May 13 – June 9           | -8.36     | -13.87 -<br>-2.86 |  | -8.25     | -13.76 - -<br>2.74 | -8.75         | -14.                         |

|                   |        |                  |        |                   |        |   |                             |
|-------------------|--------|------------------|--------|-------------------|--------|---|-----------------------------|
|                   |        |                  |        |                   |        |   | 29<br>--<br>3.2<br>0        |
| May 27 – June 23  | -10.17 | -15.33<br>--5.01 | -10.08 | -15.25 --<br>4.90 | -10.53 | - | 15.<br>68<br>--<br>5.3<br>8 |
| June 10 – July 8  | -9.62  | -14.78<br>--4.45 | -9.49  | -14.66 --<br>4.31 | -9.81  | - | 14.<br>98<br>--<br>4.6<br>4 |
| June 24 – July 22 | -10.20 | -15.46<br>--4.94 | -10.07 | -15.35 --<br>4.79 | -10.21 | - | 15.<br>49<br>--<br>4.9<br>3 |
| July 8 – Aug 5    | -9.47  | -14.80<br>--4.13 | -9.31  | -14.66 --<br>3.96 | -9.64  | - | 14.<br>99<br>--<br>4.2<br>9 |
| July 22 – Aug 19  | -7.71  | -12.95<br>--2.46 | -7.58  | -12.84 --<br>2.33 | -7.49  | - | 12.<br>73<br>--<br>2.2<br>5 |
| Aug 5 – Sept 2    | -10.51 | -15.69<br>--5.34 | -10.56 | -15.74 --<br>5.37 | -10.57 | - | 15.<br>76<br>--<br>5.3<br>8 |
| Aug 19 – Sept 16  | -10.00 | -15.24<br>--4.76 | -10.28 | -15.53 --<br>5.02 | -10.32 | - | 15.<br>55<br>--<br>5.0<br>8 |
| Sept 2 – Sept 30  | -8.53  | -13.76<br>--3.30 | -8.80  | -14.04 --<br>3.56 | -9.51  | - | 14.<br>73<br>--<br>4.3<br>0 |
| Sept 16 – Oct 14  | -10.66 | -15.93<br>--5.39 | -10.91 | -16.19 --<br>5.63 | -10.84 | - | 16.<br>08<br>--<br>5.6<br>0 |
| Sept 30 – Oct 27  | -11.69 | -17.01<br>--6.38 | -11.93 | -17.26 --<br>6.61 | -11.38 | - | 16.<br>68<br>--             |

|                 |        |                   |  |        |                    |  |                                            |
|-----------------|--------|-------------------|--|--------|--------------------|--|--------------------------------------------|
|                 |        |                   |  |        |                    |  | 6.0<br>8                                   |
| Oct 14 – Nov 11 | -11.30 | -16.51<br>- -6.09 |  | -11.55 | -16.77 - -<br>6.33 |  | -11.18<br>-<br>16.<br>41<br>--<br>5.9<br>5 |
| <b>Constant</b> | 15.72  | 11.82 -<br>19.61  |  | 15.61  | 11.72 - 19.50      |  | 15.57<br>11.<br>66<br>-<br>19.<br>48       |

**eTable 5.** Main Difference-in-Differences Estimates of the Association Between Unemployment Insurance and Outcomes of Food Insecurity and Eating Less Based on logistic regression

|                                                                   | (1) Unemployment insurance                 |             | (2) Unemployment insurance and CARES       |             | (3) Unemployment insurance amount          |             |
|-------------------------------------------------------------------|--------------------------------------------|-------------|--------------------------------------------|-------------|--------------------------------------------|-------------|
|                                                                   | Percentage points                          | 95% CI      | Percentage points                          | 95% CI      | Percentage points                          | 95% CI      |
|                                                                   | Participants: 1119<br>Observations: 12,596 |             | Participants: 1119<br>Observations: 12,596 |             | Participants: 1118<br>Observations: 12,004 |             |
| <b>(a) Food insecurity</b>                                        |                                            |             |                                            |             |                                            |             |
| <b>Unemployment insurance</b>                                     | 0.63                                       | 0.45 - 0.88 |                                            |             |                                            |             |
| <b>Unemployment insurance with CARES \$600/week supplement</b>    |                                            |             | 0.43                                       | 0.28 - 0.66 |                                            |             |
| <b>Unemployment insurance without CARES \$600/week supplement</b> |                                            |             | 0.80                                       | 0.55 - 1.15 |                                            |             |
| <b>Unemployment insurance amount</b>                              |                                            |             |                                            |             |                                            |             |
| No unemployment insurance                                         |                                            |             |                                            |             | Reference                                  |             |
| \$1 to 300                                                        |                                            |             |                                            |             | 0.68                                       | 0.41 - 1.14 |
| \$301 to 600                                                      |                                            |             |                                            |             | 0.88                                       | 0.45 - 1.73 |
| \$601 to 900                                                      |                                            |             |                                            |             | 0.62                                       | 0.33 - 1.14 |
| \$901 to 1200                                                     |                                            |             |                                            |             | 0.16                                       | 0.05 - 0.54 |
| \$1201 to 1500                                                    |                                            |             |                                            |             | 0.22                                       | 0.06 - 0.82 |
| ≥\$1500                                                           |                                            |             |                                            |             | 0.23                                       | 0.10 - 0.56 |
| <b>Stimulus payment</b>                                           | 0.69                                       | 0.46 - 1.03 | 0.69                                       | 0.46 - 1.03 | 0.69                                       | 0.45 - 1.06 |

|                           |           |             |  |           |             |  |           |             |
|---------------------------|-----------|-------------|--|-----------|-------------|--|-----------|-------------|
| <b>SNAP</b>               | 1.04      | 0.72 - 1.50 |  | 1.04      | 0.72 - 1.50 |  | 1.08      | 0.73 - 1.60 |
| <b>Currently employed</b> |           | 0.34 - 0.59 |  | 0.45      | 0.35 - 0.59 |  | 0.44      | 0.34 - 0.58 |
| <b>Study wave</b>         |           |             |  |           |             |  |           |             |
| April 1 – April 28        | Reference |             |  | Reference |             |  | Reference |             |
| April 15 – May 12         | 0.60      | 0.39 - 0.92 |  | 0.61      | 0.40 - 0.95 |  | 0.65      | 0.41 - 1.01 |
| April 29 – May 26         | 0.35      | 0.22 - 0.57 |  | 0.37      | 0.23 - 0.60 |  | 0.38      | 0.23 - 0.63 |
| May 13 – June 9           | 0.20      | 0.12 - 0.34 |  | 0.22      | 0.13 - 0.37 |  | 0.22      | 0.13 - 0.37 |
| May 27 – June 23          | 0.23      | 0.14 - 0.39 |  | 0.24      | 0.14 - 0.42 |  | 0.26      | 0.15 - 0.45 |
| June 10 – July 8          | 0.20      | 0.12 - 0.34 |  | 0.21      | 0.12 - 0.36 |  | 0.21      | 0.12 - 0.37 |
| June 24 – July 22         | 0.22      | 0.13 - 0.38 |  | 0.24      | 0.14 - 0.42 |  | 0.25      | 0.14 - 0.44 |
| July 8 – Aug 5            | 0.23      | 0.13 - 0.42 |  | 0.25      | 0.14 - 0.46 |  | 0.26      | 0.14 - 0.47 |
| July 22 – Aug 19          | 0.23      | 0.13 - 0.40 |  | 0.25      | 0.15 - 0.44 |  | 0.23      | 0.13 - 0.41 |
| Aug 5 – Sept 2            | 0.26      | 0.15 - 0.44 |  | 0.26      | 0.15 - 0.44 |  | 0.24      | 0.14 - 0.42 |
| Aug 19 – Sept 16          | 0.18      | 0.10 - 0.31 |  | 0.17      | 0.10 - 0.30 |  | 0.18      | 0.10 -      |

|                                                                   |      |             |      |             |           |             |
|-------------------------------------------------------------------|------|-------------|------|-------------|-----------|-------------|
|                                                                   |      |             |      |             |           | 0.32        |
| Sept 2 – Sept 30                                                  | 0.19 | 0.11 - 0.34 | 0.18 | 0.10 - 0.32 | 0.19      | 0.11 - 0.34 |
| Sept 16 – Oct 14                                                  | 0.14 | 0.08 - 0.25 | 0.14 | 0.08 - 0.24 | 0.14      | 0.08 - 0.25 |
| Sept 30 – Oct 27                                                  | 0.11 | 0.06 - 0.20 | 0.11 | 0.06 - 0.19 | 0.11      | 0.06 - 0.20 |
| Oct 14 – Nov 11                                                   | 0.17 | 0.10 - 0.31 | 0.17 | 0.09 - 0.30 | 0.17      | 0.10 - 0.31 |
| <b>(b) Eating less due to financial constraints</b>               |      |             |      |             |           |             |
| <b>Unemployment insurance</b>                                     | 0.47 | 0.34 - 0.66 |      |             |           |             |
| <b>Unemployment insurance with CARES \$600/week supplement</b>    |      |             | 0.35 | 0.23 - 0.53 |           |             |
| <b>Unemployment insurance without CARES \$600/week supplement</b> |      |             | 0.57 | 0.39 - 0.83 |           |             |
| <b>Unemployment insurance amount</b>                              |      |             |      |             |           |             |
| No unemployment insurance                                         |      |             |      |             | Reference |             |
| \$1 to 300                                                        |      |             |      |             | 0.52      | 0.31 - 0.86 |
| \$301 to 600                                                      |      |             |      |             | 0.43      | 0.23 - 0.80 |
| \$601 to 900                                                      |      |             |      |             | 0.41      | 0.23 - 0.76 |
| \$901 to 1200                                                     |      |             |      |             | 0.44      | 0.18 - 1.05 |
| \$1201 to 1500                                                    |      |             |      |             | 0.28      | 0.08 - 0.92 |
| ≥\$1500                                                           |      |             |      |             | 0.17      | 0.07 -      |

|                           |           |             |  |           |             |           |             |
|---------------------------|-----------|-------------|--|-----------|-------------|-----------|-------------|
|                           |           |             |  |           |             | 0.40      |             |
| <b>Stimulus payment</b>   | 0.61      | 0.40 - 0.91 |  | 0.61      | 0.40 - 0.91 | 0.62      | 0.41 - 0.95 |
| <b>SNAP</b>               | 0.90      | 0.62 - 1.31 |  | 0.91      | 0.63 - 1.31 | 0.96      | 0.65 - 1.42 |
| <b>Currently employed</b> | 0.40      | 0.30 - 0.51 |  | 0.40      | 0.31 - 0.52 | 0.39      | 0.30 - 0.51 |
| <b>Study wave</b>         |           |             |  |           |             |           |             |
| April 1 – April 28        | Reference |             |  | Reference |             | Reference |             |
| April 15 – May 12         | 0.53      | 0.35 - 0.81 |  | 0.54      | 0.35 - 0.83 | 0.55      | 0.36 - 0.85 |
| April 29 – May 26         | 0.35      | 0.22 - 0.56 |  | 0.36      | 0.23 - 0.58 | 0.38      | 0.24 - 0.61 |
| May 13 – June 9           | 0.25      | 0.15 - 0.41 |  | 0.26      | 0.16 - 0.43 | 0.27      | 0.16 - 0.45 |
| May 27 – June 23          | 0.19      | 0.11 - 0.33 |  | 0.20      | 0.12 - 0.34 | 0.20      | 0.12 - 0.34 |
| June 10 – July 8          | 0.20      | 0.12 - 0.34 |  | 0.21      | 0.12 - 0.36 | 0.21      | 0.12 - 0.36 |
| June 24 – July 22         | 0.16      | 0.09 - 0.28 |  | 0.17      | 0.10 - 0.29 | 0.17      | 0.10 - 0.30 |
| July 8 – Aug 5            | 0.22      | 0.12 - 0.39 |  | 0.24      | 0.13 - 0.42 | 0.22      | 0.12 - 0.40 |
| July 22 – Aug 19          | 0.24      | 0.14 - 0.41 |  | 0.26      | 0.15 - 0.44 | 0.25      | 0.15 - 0.44 |

|                  |      |             |  |      |             |      |             |
|------------------|------|-------------|--|------|-------------|------|-------------|
| Aug 5 – Sept 2   | 0.23 | 0.13 - 0.38 |  | 0.23 | 0.13 - 0.39 | 0.22 | 0.13 - 0.38 |
| Aug 19 – Sept 16 | 0.19 | 0.11 - 0.34 |  | 0.19 | 0.11 - 0.32 | 0.20 | 0.11 - 0.35 |
| Sept 2 – Sept 30 | 0.23 | 0.14 - 0.40 |  | 0.22 | 0.13 - 0.38 | 0.21 | 0.12 - 0.37 |
| Sept 16 – Oct 14 | 0.18 | 0.10 - 0.31 |  | 0.17 | 0.10 - 0.29 | 0.17 | 0.10 - 0.30 |
| Sept 30 – Oct 27 | 0.19 | 0.11 - 0.33 |  | 0.18 | 0.10 - 0.32 | 0.18 | 0.10 - 0.31 |
| Oct 14 – Nov 11  | 0.17 | 0.09 - 0.29 |  | 0.16 | 0.09 - 0.28 | 0.17 | 0.09 - 0.30 |



**eTable 6.** Main Difference-in-Differences Estimates of the Association Between Unemployment Insurance and Outcomes of Food Insecurity and Eating Less Among Those Currently Unemployed

|                                                                   | (1) Unemployment insurance               |               | (2) Unemployment insurance and CARES     |                | (3) Unemployment insurance amount        |                |
|-------------------------------------------------------------------|------------------------------------------|---------------|------------------------------------------|----------------|------------------------------------------|----------------|
|                                                                   | Participants: 1104<br>Observations: 7384 |               | Participants: 1104<br>Observations: 7384 |                | Participants: 1099<br>Observations: 6792 |                |
|                                                                   | Percentage points                        | 95% CI        | Percentage points                        | 95% CI         | Percentage points                        | 95% CI         |
| <b>(a) Food insecurity</b>                                        |                                          |               |                                          |                |                                          |                |
| <b>Unemployment insurance</b>                                     | -5.89                                    | -9.58 - -2.19 |                                          |                |                                          |                |
| <b>Unemployment insurance with CARES \$600/week supplement</b>    |                                          |               | -7.24                                    | -11.00 - -3.48 |                                          |                |
| <b>Unemployment insurance without CARES \$600/week supplement</b> |                                          |               | -4.50                                    | -8.63 - -0.37  |                                          |                |
| <b>Unemployment insurance amount</b>                              |                                          |               |                                          |                |                                          |                |
| No unemployment insurance                                         |                                          |               |                                          |                | Reference                                |                |
| \$1 to 300                                                        |                                          |               |                                          |                | -5.53                                    | -10.24 - -0.81 |
| \$301 to 600                                                      |                                          |               |                                          |                | -3.91                                    | -8.66 - -0.84  |
| \$601 to 900                                                      |                                          |               |                                          |                | -6.23                                    | -10.40 - -2.05 |
| \$901 to 1200                                                     |                                          |               |                                          |                | -7.48                                    | -12.57 - -2.39 |
| \$1201 to 1500                                                    |                                          |               |                                          |                | -6.59                                    | -10.64 - -2.53 |
| ≥\$1500                                                           |                                          |               |                                          |                | -8.35                                    | -12.46 - -4.23 |

|                         |           |                   |  |           |                    |  |               |                                  |
|-------------------------|-----------|-------------------|--|-----------|--------------------|--|---------------|----------------------------------|
| <b>Stimulus payment</b> | -0.89     | -4.73 -<br>2.94   |  | -0.85     | -4.70 - 2.99       |  | -0.09         | -<br>3.7<br>7 -<br>3.5<br>9      |
| <b>SNAP</b>             | -2.73     | -6.76 -<br>1.31   |  | -2.72     | -6.76 - 1.32       |  | -3.32         | -<br>7.7<br>2 -<br>1.0<br>8      |
| <b>Study wave</b>       |           |                   |  |           |                    |  |               |                                  |
| April 1 – April 28      | Reference |                   |  | Reference |                    |  | Refere<br>nce |                                  |
| April 15 – May 12       | -2.32     | -6.31 -<br>1.68   |  | -2.17     | -6.15 - 1.80       |  | -2.27         | -<br>6.2<br>7 -<br>1.7<br>3      |
| April 29 – May 26       | -5.32     | -9.78 -<br>-0.87  |  | -5.03     | -9.45 - -0.62      |  | -5.50         | -<br>9.8<br>5 -<br>-<br>1.1<br>5 |
| May 13 – June 9         | -7.65     | -12.51 -<br>-2.78 |  | -7.29     | -12.11 - -<br>2.47 |  | -7.83         | -<br>12.<br>55<br>--<br>3.1<br>1 |
| May 27 – June 23        | -7.71     | -12.57 -<br>-2.85 |  | -7.33     | -12.14 - -<br>2.52 |  | -7.63         | -<br>12.<br>53<br>--<br>2.7<br>3 |
| June 10 – July 8        | -8.52     | -13.50 -<br>-3.54 |  | -8.09     | -13.04 - -<br>3.15 |  | -9.03         | -<br>13.<br>98<br>--<br>4.0<br>7 |
| June 24 – July 22       | -8.76     | -13.84 -<br>-3.68 |  | -8.32     | -13.36 - -<br>3.29 |  | -8.57         | -<br>13.<br>58<br>--<br>3.5<br>5 |
| July 8 – Aug 5          | -8.66     | -13.79 -<br>-3.53 |  | -8.19     | -13.26 - -<br>3.11 |  | -8.76         | -<br>13.<br>84<br>--<br>3.6<br>8 |
| July 22 – Aug 19        | -7.75     | -13.02 -<br>-2.48 |  | -7.36     | -12.56 - -<br>2.15 |  | -8.22         | -<br>13.<br>62<br>--<br>2.8<br>2 |

|                                                                   |        |                  |        |                   |           |                                  |
|-------------------------------------------------------------------|--------|------------------|--------|-------------------|-----------|----------------------------------|
| Aug 5 – Sept 2                                                    | -7.08  | -12.45<br>--1.71 | -7.18  | -12.57 --<br>1.79 | -8.21     | -<br>13.<br>72<br>--<br>2.7<br>0 |
| Aug 19 – Sept 16                                                  | -9.32  | -14.82<br>--3.81 | -9.92  | -15.60 --<br>4.24 | -10.04    | -<br>15.<br>66<br>--<br>4.4<br>3 |
| Sept 2 – Sept 30                                                  | -7.49  | -12.90<br>--2.08 | -8.14  | -13.72 --<br>2.57 | -8.20     | -<br>13.<br>65<br>--<br>2.7<br>5 |
| Sept 16 – Oct 14                                                  | -9.90  | -15.50<br>--4.30 | -10.54 | -16.29 --<br>4.78 | -10.61    | -<br>16.<br>39<br>--<br>4.8<br>3 |
| Sept 30 – Oct 27                                                  | -11.20 | -16.67<br>--5.73 | -11.85 | -17.48 --<br>6.22 | -11.76    | -<br>17.<br>37<br>--<br>6.1<br>5 |
| Oct 14 – Nov 11                                                   | -8.25  | -13.59<br>--2.91 | -8.90  | -14.41 --<br>3.39 | -8.56     | -<br>14.<br>08<br>--<br>3.0<br>4 |
| <b>Constant</b>                                                   | 24.71  | 21.40 -<br>28.03 | 24.60  | 21.29 -<br>27.91  | 24.12     | 20.<br>87<br>-<br>27.<br>37      |
|                                                                   |        |                  |        |                   |           |                                  |
| <b>(b) Eating less due to financial constraints</b>               |        |                  |        |                   |           |                                  |
| <b>Unemployment insurance</b>                                     | -7.88  | -11.89<br>--3.87 |        |                   |           |                                  |
| <b>Unemployment insurance with CARES \$600/week supplement</b>    |        |                  | -9.05  | -13.09 --<br>5.01 |           |                                  |
| <b>Unemployment insurance without CARES \$600/week supplement</b> |        |                  | -6.68  | -11.08 --<br>2.28 |           |                                  |
| <b>Unemployment insurance amount</b>                              |        |                  |        |                   |           |                                  |
| No unemployment insurance                                         |        |                  |        |                   | Reference |                                  |
| \$1 to 300                                                        |        |                  |        |                   | -7.15     | -<br>12.<br>69<br>--<br>1.6<br>2 |

|                         |           |                |           |                |  |           |                      |
|-------------------------|-----------|----------------|-----------|----------------|--|-----------|----------------------|
| \$301 to 600            |           |                |           |                |  | -9.39     | -14.88<br>--<br>3.89 |
| \$601 to 900            |           |                |           |                |  | -8.94     | -13.77<br>--<br>4.11 |
| \$901 to 1200           |           |                |           |                |  | -7.02     | -11.53<br>--<br>2.51 |
| \$1201 to 1500          |           |                |           |                |  | -7.92     | -12.49<br>--<br>3.35 |
| ≥\$1500                 |           |                |           |                |  | -12.10    | -16.99<br>--<br>7.21 |
| <b>Stimulus payment</b> | -2.38     | -6.63 - 1.86   | -2.35     | -6.60 - 1.91   |  | -1.84     | -6.07 - 2.39         |
| <b>SNAP</b>             | -2.27     | -6.61 - 2.07   | -2.27     | -6.61 - 2.07   |  | -2.82     | -7.32 - 1.69         |
| <b>Study wave</b>       |           |                |           |                |  |           |                      |
| April 1 – April 28      | Reference |                | Reference |                |  | Reference |                      |
| April 15 – May 12       | -2.32     | -6.31 - 1.68   | -2.17     | -6.15 - 1.80   |  | -2.27     | -6.27 - 1.73         |
| April 29 – May 26       | -5.32     | -9.78 - -0.87  | -5.03     | -9.45 - -0.62  |  | -5.50     | -9.85 - -1.15        |
| May 13 – June 9         | -7.65     | -12.51 - -2.78 | -7.29     | -12.11 - -2.47 |  | -7.83     | -12.55 - -3.11       |

|                   |        |                  |        |                   |        |                                  |
|-------------------|--------|------------------|--------|-------------------|--------|----------------------------------|
| May 27 – June 23  | -7.71  | -12.57<br>--2.85 | -7.33  | -12.14 --<br>2.52 | -7.63  | -<br>12.<br>53<br>--<br>2.7<br>3 |
| June 10 – July 8  | -8.52  | -13.50<br>--3.54 | -8.09  | -13.04 --<br>3.15 | -9.03  | -<br>13.<br>98<br>--<br>4.0<br>7 |
| June 24 – July 22 | -8.76  | -13.84<br>--3.68 | -8.32  | -13.36 --<br>3.29 | -8.57  | -<br>13.<br>58<br>--<br>3.5<br>5 |
| July 8 – Aug 5    | -8.66  | -13.79<br>--3.53 | -8.19  | -13.26 --<br>3.11 | -8.76  | -<br>13.<br>84<br>--<br>3.6<br>8 |
| July 22 – Aug 19  | -7.75  | -13.02<br>--2.48 | -7.36  | -12.56 --<br>2.15 | -8.22  | -<br>13.<br>62<br>--<br>2.8<br>2 |
| Aug 5 – Sept 2    | -7.08  | -12.45<br>--1.71 | -7.18  | -12.57 --<br>1.79 | -8.21  | -<br>13.<br>72<br>--<br>2.7<br>0 |
| Aug 19 – Sept 16  | -9.32  | -14.82<br>--3.81 | -9.92  | -15.60 --<br>4.24 | -10.04 | -<br>15.<br>66<br>--<br>4.4<br>3 |
| Sept 2 – Sept 30  | -7.49  | -12.90<br>--2.08 | -8.14  | -13.72 --<br>2.57 | -8.20  | -<br>13.<br>65<br>--<br>2.7<br>5 |
| Sept 16 – Oct 14  | -9.90  | -15.50<br>--4.30 | -10.54 | -16.29 --<br>4.78 | -10.61 | -<br>16.<br>39<br>--<br>4.8<br>3 |
| Sept 30 – Oct 27  | -11.20 | -16.67<br>--5.73 | -11.85 | -17.48 --<br>6.22 | -11.76 | -<br>17.<br>37<br>--<br>6.1<br>5 |
| Oct 14 – Nov 11   | -8.25  | -13.59<br>--2.91 | -8.90  | -14.41 --<br>3.39 | -8.56  | -<br>14.                         |

|                 |       |                  |  |       |                  |       |     |
|-----------------|-------|------------------|--|-------|------------------|-------|-----|
|                 |       |                  |  |       |                  |       | 08  |
|                 |       |                  |  |       |                  |       | --  |
|                 |       |                  |  |       |                  |       | 3.0 |
|                 |       |                  |  |       |                  |       | 4   |
| <b>Constant</b> | 27.12 | 23.72 -<br>30.53 |  | 27.02 | 23.61 -<br>30.43 |       | 23. |
|                 |       |                  |  |       |                  | 26.58 | 18  |
|                 |       |                  |  |       |                  |       | -   |
|                 |       |                  |  |       |                  |       | 29. |
|                 |       |                  |  |       |                  |       | 99  |

Notes: The sample size was smaller because 15 people were missing a covariate or outcome value in the wave in which they reported not having employment

**eTable 7.** Main Difference-in-Differences Estimates of the Association Between Unemployment Insurance and Outcomes of Food Insecurity and Eating Less in Very Low-Income Households (<\$20 000/Year)

|                                                            | (1) Unemployment insurance              |                | (2) Unemployment insurance and CARES    |                | (3) Unemployment insurance amount       |                 |
|------------------------------------------------------------|-----------------------------------------|----------------|-----------------------------------------|----------------|-----------------------------------------|-----------------|
|                                                            | Percentage points                       | 95% CI         | Percentage points                       | 95% CI         | Percentage points                       | 95% CI          |
|                                                            | Participants: 282<br>Observations: 2890 |                | Participants: 282<br>Observations: 2890 |                | Participants: 282<br>Observations: 2687 |                 |
| <b>(a) Food insecurity</b>                                 |                                         |                |                                         |                |                                         |                 |
| Unemployment insurance                                     | -6.58                                   | -12.25 - -0.92 |                                         |                |                                         |                 |
| Unemployment insurance with CARES \$600/week supplement    |                                         |                | -8.07                                   | -14.24 - -1.91 |                                         |                 |
| Unemployment insurance without CARES \$600/week supplement |                                         |                | -5.58                                   | -11.79 - -0.64 |                                         |                 |
| Unemployment insurance amount                              |                                         |                |                                         |                |                                         |                 |
| No unemployment insurance                                  |                                         |                |                                         |                |                                         |                 |
| \$1 to 300                                                 |                                         |                |                                         |                | -7.15                                   | -14.80 - -0.49  |
| \$301 to 600                                               |                                         |                |                                         |                | -3.79                                   | -11.76 - -4.18  |
| \$601 to 900                                               |                                         |                |                                         |                | -8.86                                   | -17.15 - -0.58  |
| \$901 to 1200                                              |                                         |                |                                         |                | -6.96                                   | -23.99 - -10.06 |
| \$1201 to 1500                                             |                                         |                |                                         |                | -10.46                                  | -18.54 - --     |

|                           |           |                   |  |           |                   |        |                                  |
|---------------------------|-----------|-------------------|--|-----------|-------------------|--------|----------------------------------|
|                           |           |                   |  |           |                   |        | 2.3<br>8                         |
| ≥\$1500                   |           |                   |  |           |                   | -9.07  | -<br>15.<br>67<br>--<br>2.4<br>7 |
| <b>Stimulus payment</b>   | -5.50     | -12.40 -<br>1.40  |  | -5.51     | -12.43 - 1.41     | -2.71  | -<br>9.8<br>6 -<br>4.4<br>3      |
| <b>SNAP</b>               | -4.22     | -10.60 -<br>2.15  |  | -4.25     | -10.64 - 2.15     | -2.96  | -<br>9.8<br>0 -<br>3.8<br>8      |
| <b>Currently employed</b> | -6.03     | -10.28 -<br>-1.78 |  | -5.88     | -10.06 --<br>1.70 | -5.73  | -<br>10.<br>09<br>--<br>1.3<br>7 |
| <b>Study wave</b>         |           |                   |  |           |                   |        |                                  |
| April 1 – April 28        | Reference |                   |  | Reference |                   |        |                                  |
| April 15 – May 12         | -7.60     | -15.42 -<br>0.22  |  | -7.54     | -15.36 - 0.28     | -8.41  | -<br>16.<br>36<br>--<br>0.4<br>6 |
| April 29 – May 26         | -8.93     | -17.57 -<br>-0.30 |  | -8.78     | -17.42 --<br>0.15 | -10.77 | -<br>19.<br>43<br>--<br>2.1<br>1 |
| May 13 – June 9           | -14.60    | -23.67 -<br>-5.53 |  | -14.40    | -23.47 --<br>5.34 | -17.13 | -<br>26.<br>30<br>--<br>7.9<br>5 |
| May 27 – June 23          | -14.31    | -23.44 -<br>-5.17 |  | -14.11    | -23.22 --<br>5.00 | -15.88 | -<br>25.<br>38<br>--<br>6.3<br>8 |
| June 10 – July 8          | -15.77    | -24.86 -<br>-6.69 |  | -15.47    | -24.55 --<br>6.40 | -18.24 | -<br>27.                         |



|                   |        |                    |        |                    |        |   |                              |
|-------------------|--------|--------------------|--------|--------------------|--------|---|------------------------------|
|                   |        |                    |        |                    |        |   | 41<br>--<br>9.0<br>7         |
| June 24 – July 22 | -12.52 | -21.55 -<br>-3.49  | -12.21 | -21.22 --<br>3.20  | -14.87 | - | 24.<br>04<br>--<br>5.7<br>0  |
| July 8 – Aug 5    | -14.11 | -23.31 -<br>-4.92  | -13.68 | -22.92 --<br>4.45  | -15.59 | - | 25.<br>13<br>--<br>6.0<br>5  |
| July 22 – Aug 19  | -14.59 | -24.19 -<br>-4.99  | -14.21 | -23.82 --<br>4.60  | -16.79 | - | 26.<br>83<br>--<br>6.7<br>6  |
| Aug 5 – Sept 2    | -13.87 | -23.06 -<br>-4.68  | -13.81 | -23.01 --<br>4.60  | -16.54 | - | 25.<br>99<br>--<br>7.0<br>9  |
| Aug 19 – Sept 16  | -16.59 | -26.27 -<br>-6.90  | -16.86 | -26.64 --<br>7.09  | -19.50 | - | 29.<br>51<br>--<br>9.4<br>8  |
| Sept 2 – Sept 30  | -16.02 | -25.64 -<br>-6.39  | -16.30 | -25.97 --<br>6.63  | -18.12 | - | 27.<br>94<br>--<br>8.2<br>9  |
| Sept 16 – Oct 14  | -18.68 | -28.36 -<br>-8.99  | -18.97 | -28.70 --<br>9.24  | -21.05 | - | 31.<br>01<br>--<br>11.<br>09 |
| Sept 30 – Oct 27  | -19.80 | -29.23 -<br>-10.38 | -20.09 | -29.56 --<br>10.62 | -21.80 | - | 31.<br>49<br>--<br>12.<br>11 |

|                                                                   |        |                   |        |                   |        |                                  |
|-------------------------------------------------------------------|--------|-------------------|--------|-------------------|--------|----------------------------------|
|                                                                   | -16.36 | -25.98 -<br>-6.74 | -16.66 | -26.34 --<br>6.99 | -18.25 | -<br>28.<br>31<br>--<br>8.1<br>8 |
| <b>Constant</b>                                                   | 44.26  | 37.43 -<br>51.09  | 44.19  | 37.34 -<br>51.05  | 43.93  | 37.<br>05<br>-<br>50.<br>80      |
| <b>(b) Eating less due to financial constraints</b>               |        |                   |        |                   |        |                                  |
| <b>Unemployment insurance</b>                                     | -8.88  | -16.15 -<br>-1.61 |        |                   |        |                                  |
| <b>Unemployment insurance with CARES \$600/week supplement</b>    |        |                   | -9.49  | -17.19 --<br>1.78 |        |                                  |
| <b>Unemployment insurance without CARES \$600/week supplement</b> |        |                   | -8.20  | -15.63 --<br>0.76 |        |                                  |
| <b>Unemployment insurance amount</b>                              |        |                   |        |                   |        |                                  |
| No unemployment insurance                                         |        |                   |        |                   |        |                                  |
| \$1 to 300                                                        |        |                   |        |                   | -9.82  | -<br>19.<br>92<br>-<br>0.2<br>7  |
| \$301 to 600                                                      |        |                   |        |                   | -6.21  | -<br>17.<br>05<br>-<br>4.6<br>3  |
| \$601 to 900                                                      |        |                   |        |                   | -13.55 | -<br>24.<br>70<br>--<br>2.4<br>1 |
| \$901 to 1200                                                     |        |                   |        |                   | -11.31 | -<br>18.<br>69<br>--<br>3.9<br>3 |
| \$1201 to 1500                                                    |        |                   |        |                   | -9.97  | -<br>18.<br>60<br>--<br>1.3<br>5 |

|                           |           |                    |  |           |                    |        |                                   |
|---------------------------|-----------|--------------------|--|-----------|--------------------|--------|-----------------------------------|
| ≥\$1500                   |           |                    |  |           |                    | -12.17 | -<br>23.<br>00<br>--<br>1.3<br>4  |
| <b>Stimulus payment</b>   | -2.38     | -9.41 -<br>4.65    |  | -2.39     | -9.44 - 4.66       | 0.18   | -<br>6.9<br>7 -<br>7.3<br>3       |
| <b>SNAP</b>               | -4.72     | -11.95 -<br>2.52   |  | -4.76     | -11.99 - 2.47      | -4.12  | -<br>11.<br>55<br>-<br>3.3<br>1   |
| <b>Currently employed</b> | -6.64     | -11.68 -<br>-1.59  |  | -6.42     | -11.39 --<br>1.46  | -6.34  | -<br>11.<br>47<br>--<br>1.2<br>1  |
| <b>Study wave</b>         |           |                    |  |           |                    |        |                                   |
| April 1 – April 28        | Reference |                    |  | Reference |                    |        |                                   |
| April 15 – May 12         | -10.16    | -17.30 -<br>-3.03  |  | -10.14    | -17.28 --<br>2.99  | -10.78 | -<br>18.<br>06<br>--<br>3.5<br>0  |
| April 29 – May 26         | -15.78    | -23.93 -<br>-7.64  |  | -15.72    | -23.88 --<br>7.56  | -17.06 | -<br>25.<br>46<br>--<br>8.6<br>6  |
| May 13 – June 9           | -15.53    | -24.27 -<br>-6.78  |  | -15.46    | -24.19 --<br>6.73  | -17.44 | -<br>26.<br>41<br>--<br>8.4<br>7  |
| May 27 – June 23          | -19.58    | -28.71 -<br>-10.45 |  | -19.52    | -28.63 --<br>10.41 | -22.20 | -<br>31.<br>32<br>--<br>13.<br>07 |
| June 10 – July 8          | -19.97    | -28.98 -<br>-10.96 |  | -19.77    | -28.81 --<br>10.74 | -22.14 | -<br>31.<br>29                    |

|                   |        |                    |        |                    |        |   |                              |
|-------------------|--------|--------------------|--------|--------------------|--------|---|------------------------------|
|                   |        |                    |        |                    |        |   | --<br>13.<br>00              |
| June 24 – July 22 | -19.56 | -28.58 -<br>-10.54 | -19.39 | -28.41 --<br>10.36 | -21.35 | - | 30.<br>54<br>--<br>12.<br>16 |
| July 8 – Aug 5    | -21.62 | -30.86 -<br>-12.39 | -21.38 | -30.63 --<br>12.13 | -23.63 | - | 33.<br>07<br>--<br>14.<br>19 |
| July 22 – Aug 19  | -22.06 | -31.22 -<br>-12.90 | -21.81 | -30.96 --<br>12.65 | -23.92 | - | 33.<br>23<br>--<br>14.<br>62 |
| Aug 5 – Sept 2    | -21.27 | -30.57 -<br>-11.97 | -21.21 | -30.53 --<br>11.89 | -22.94 | - | 32.<br>52<br>--<br>13.<br>35 |
| Aug 19 – Sept 16  | -21.61 | -31.03 -<br>-12.19 | -21.81 | -31.24 --<br>12.38 | -23.49 | - | 33.<br>12<br>--<br>13.<br>86 |
| Sept 2 – Sept 30  | -22.05 | -31.76 -<br>-12.34 | -22.27 | -32.00 --<br>12.53 | -24.70 | - | 34.<br>74<br>--<br>14.<br>66 |
| Sept 16 – Oct 14  | -23.45 | -32.80 -<br>-14.10 | -23.66 | -33.03 --<br>14.29 | -25.94 | - | 35.<br>49<br>--<br>16.<br>39 |
| Sept 30 – Oct 27  | -21.92 | -31.67 -<br>-12.18 | -22.13 | -31.89 --<br>12.38 | -24.35 | - | 34.<br>36<br>--<br>14.<br>35 |

|                 |        |                    |        |                    |        |                                   |
|-----------------|--------|--------------------|--------|--------------------|--------|-----------------------------------|
| Oct 14 – Nov 11 | -23.88 | -32.97 -<br>-14.79 | -24.10 | -33.23 --<br>14.98 | -25.57 | -<br>34.<br>90<br>--<br>16.<br>25 |
| <b>Constant</b> | 46.72  | 39.96 -<br>53.47   | 46.65  | 39.88 -<br>53.42   | 46.56  | 39.<br>77<br>-<br>53.<br>35       |
